# Supplementary material
Source: PubMed Central journal article supplement (PMC3718189)
Supplement: NIHMS475472-supplement-01.pdf [file NIHMS475472-supplement-01.pdf]

**Supporting Information for**

# Linking In-Vehicle Ultrafine Particle Exposures to On-Road Concentrations

Neelakshi Hudda<sup>1</sup>, Sandrah P. Eckel<sup>2</sup>, Luke D. Knibbs<sup>3</sup>, Constantinos Sioutas<sup>1</sup>, Ralph J. Delfino<sup>4</sup>, and Scott A. Fruin<sup>5\*</sup>

<sup>1</sup>Department of Civil and Environmental Engineering, University of Southern California, Los Angeles, CA 90089

<sup>2</sup>Keck School of Medicine, Biostatistics Division, University of Southern California, Los Angeles, CA 90033

<sup>3</sup>International Laboratory for Air Quality and Health, Queensland University of Technology, Brisbane, QLD 4001, Australia

<sup>4</sup>Department of Epidemiology, School of Medicine, University of California, Irvine, CA 92617

<sup>5</sup>Keck School of Medicine, Environmental Health Division, University of Southern California, Los Angeles, CA 90033

\*Corresponding Author Email: [fruin@usc.edu](mailto:fruin@usc.edu)

## S.1 Vehicles tested

Table S1: List of Vehicles tested in the study.

| Manufacturer | Model          | Year | Odometer | Manufacturer | Model      | Year | Odometer |
|--------------|----------------|------|----------|--------------|------------|------|----------|
| Mazda        | Mazda121       | 1989 | 98955    | Chevrolet    | Tahoe      | 2002 | 157776   |
| Toyota       | Cressida       | 1990 | 286872   | Ford         | E Series   | 2003 | 196778   |
| Buick        | Sabre          | 1991 | 191198   | Chevrolet    | Silverado  | 2004 | 123634   |
| Toyota       | Camry          | 1992 | 332878   | Chevrolet    | Cavalier   | 2004 | 109509   |
| Buick        | Sabre          | 1992 | 197576   | Chevrolet    | Traverse   | 2004 | 43235    |
| Cadillac     | DeVille        | 1993 | 265342   | Toyota       | Corolla    | 2005 | 53234    |
| Honda        | Accord         | 1993 | 134521   | Honda        | Accord     | 2005 | 106656   |
| Saab         | Saab           | 1994 | 137600   | Chevrolet    | Silverado  | 2005 | 152896   |
| Chevrolet    | Astro van      | 1995 | 280046   | Mazda        | Mazda-6    | 2005 | 141003   |
| Jeep         | Cherokee       | 1995 | 225835   | VW           | Golf       | 2005 | 10663    |
| Jeep         | Cherokee       | 1995 | 306675   | Toyota       | Scion xB   | 2006 | 70538    |
| Toyota       | Corolla        | 1996 | 300774   | GMC          | Sierra     | 2006 | 118160   |
| Nissan       | Sentra         | 1996 | 428982   | Toyota       | Corolla    | 2006 | 139461   |
| Toyota       | RAV4           | 1997 | 295957   | GMC          | Colorado   | 2007 | 65238    |
| Hyundai      | Accent         | 1997 | 164968   | Honda        | Accord     | 2007 | 67800    |
| Honda        | Civic          | 1998 | 137430   | Toyota       | Yaris      | 2007 | 67141    |
| Mitsubishi   | Magna          | 1998 | 85677    | Toyota       | Matrix     | 2007 | 65501    |
| Honda        | Civic          | 1999 | 122336   | Subaru       | Outback    | 2007 | 6777     |
| Toyota       | Lexus          | 1999 | 80528    | Chrysler     | Crysler300 | 2008 | 66955    |
| Ford         | Expedition     | 1999 | 86061    | Toyota       | Hilux      | 2005 | 6992     |
| Honda        | Accord         | 1999 | 244470   | Toyota       | Prius      | 2009 | 16713    |
| Ford         | Taurus         | 1999 | 156619   | Toyota       | Scion xD   | 2009 | 11200    |
| Ford         | Contour        | 1999 | 183632   | Toyota       | Scion XB   | 2009 | 63894    |
| Honda        | Accord         | 2000 | 148626   | Toyota       | Matrix     | 2009 | 42078    |
| Subaru       | Liberty        | 2000 | 58648    | Ford         | Explorer   | 2010 | 1893     |
| Toyota       | Corolla        | 2000 | 126176   | Toyota       | Prius      | 2010 | 4733     |
| Toyota       | Camry          | 2000 | 167235   | Toyota       | Prius      | 2010 | 26741    |
| Chevrolet    | Tahoe          | 2001 | 142445   | Toyota       | Scion XB   | 2010 | 39934    |
| Ford         | Escort         | 2001 | 202419   | Honda        | Insight    | 2010 | 45771    |
| Nissan       | Pathfinder     | 2001 | 258848   | Honda        | Insight    | 2010 | 39740    |
| Chevrolet    | Cavalier       | 2001 | 80184    | Honda        | Civic      | 2010 | 10245    |
| Chevrolet    | Express 2500SL | 2002 | 24882    | Smart        | SmartCar   | 2010 | 2339     |
| Nissan       | Infinity G35   | 2002 | 98219    | Toyota       | Prius      | 2010 | 1893     |
| Toyota       | Camry          | 2002 | 173610   | Honda        | Civic      | 2010 | 35520    |
| Toyota       | RAV4           | 2002 | 387434   | Hyundai      | Elantra    | 2011 | 660      |
| Audi         | A4             | 2002 | 166126   |              |            |      |          |

## S.2 Instrumentation

Table S: Instruments used for the study.

| INSTRUMENT               |       |                                                                                       |                                                                        |                        |
|--------------------------|-------|---------------------------------------------------------------------------------------|------------------------------------------------------------------------|------------------------|
|                          | Units | TSI Q-TRAK<br>7565                                                                    | LICOR LI-820                                                           | Garmin<br>GPSMAP 76CSC |
| Range                    |       | 0-5000 ppm                                                                            | 0-20000 ppm                                                            |                        |
| Resolution               |       | 1 ppm                                                                                 | 0.1 ppm                                                                | 0.1 mph                |
| Accuracy                 |       | ±3% of reading<br>or ±50 ppm,<br>whichever is<br>greater                              | >3% of the<br>reported value                                           | 0.05 m/sec             |
| Response Time            |       | 20 secs                                                                               | -                                                                      | 1 sec                  |
| Logging Interval         | (sec) | 10                                                                                    | 1                                                                      | 1                      |
| Averaging<br>Interval    | (sec) | 10                                                                                    | 10                                                                     | 10                     |
| Calibration<br>Frequency |       | ~ 50 hours of<br>operation                                                            | Factory<br>Calibration<br>before and after<br>the sampling<br>campaign | -                      |
| Time-Sync<br>Frequency   |       | ~ < 10 hours of<br>operation                                                          | At the<br>beginning of<br>each car tested                              | -                      |
|                          | Units | CPC 3007                                                                              |                                                                        |                        |
| Range                    |       | Size: 0.01 to >1<br>µm<br>Concentration: 0<br>to 100,000<br>particles/cm <sup>3</sup> |                                                                        |                        |
| Resolution               |       | 1 particle/cm <sup>3</sup>                                                            |                                                                        |                        |
| Accuracy                 |       | ±20%                                                                                  |                                                                        |                        |
| Response Time            |       | <9 sec for 95%<br>response                                                            |                                                                        |                        |
| Logging Interval         | (sec) | 1 sec                                                                                 |                                                                        |                        |
| Averaging<br>Interval    | (sec) | 10 sec                                                                                |                                                                        |                        |
| Calibration<br>Frequency |       | Factory<br>calibrated<br>before study                                                 |                                                                        |                        |
| Time-Sync<br>Frequency   |       | every operation                                                                       |                                                                        |                        |

### S.3 Input Distributions

#### S.3.1 Age Distribution

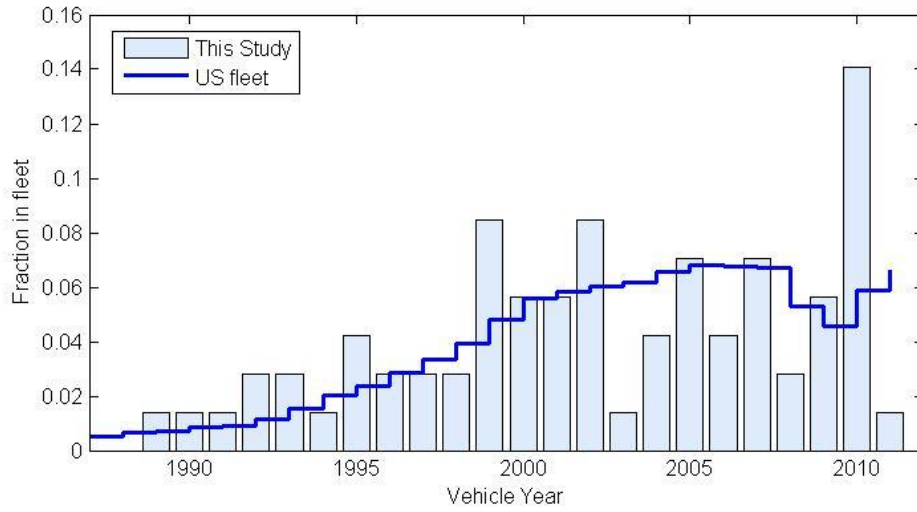

#### S.3.2 Speed Distribution

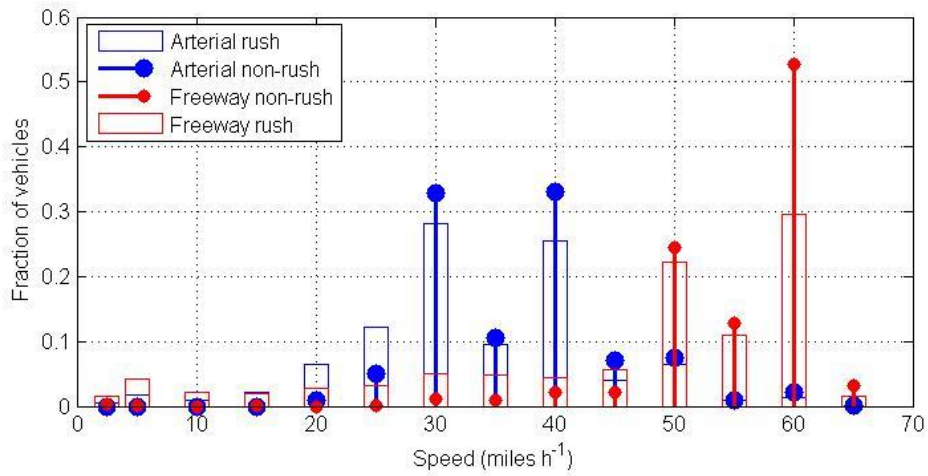

#### S.3.3 Volume Distribution

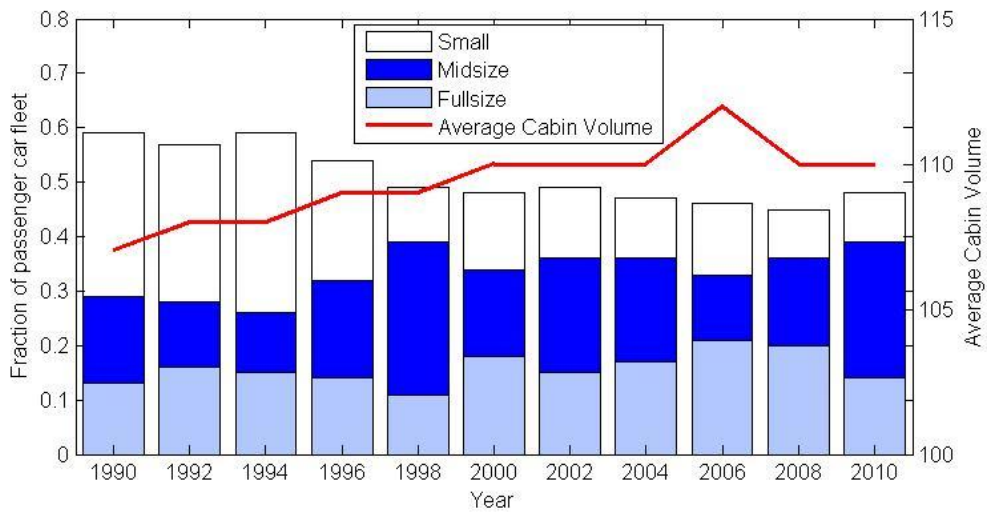

### S.3.4 Manufacturer Distribution

Table S3: Manufacturer share of the vehicles in operation in U.S.

| <b>Manufacturer</b> | <b>% of vehicle currently in operation</b> |
|---------------------|--------------------------------------------|
| Ford                | 20                                         |
| GM                  | 28.5                                       |
| Chrysler            | 12.8                                       |
| Toyota              | 11.8                                       |
| Honda               | 8.1                                        |
| Nissan              | 5.3                                        |
| Hyundai             | 2.9                                        |
| Other               | 10.6                                       |

### S.3.5 Percentile values for distribution of ultrafine particles on roadways

Table S4: Ultrafine Particle Distribution on typical arterial roads and freeways in Los Angeles.

| Percentile | Concentration Arterial | Concentration Freeway | Percentile | Concentration Arterial | Concentration Freeway |
|------------|------------------------|-----------------------|------------|------------------------|-----------------------|
| 1          | 8413                   | 13588                 | 51         | 24137                  | 65712                 |
| 2          | 9548                   | 15798                 | 52         | 24489                  | 66452                 |
| 3          | 10325                  | 18335                 | 53         | 24850                  | 67433                 |
| 4          | 10898                  | 19693                 | 54         | 25192                  | 68434                 |
| 5          | 11238                  | 20901                 | 55         | 25576                  | 69225                 |
| 6          | 11556                  | 22667                 | 56         | 26031                  | 70155                 |
| 7          | 11872                  | 24166                 | 57         | 26520                  | 70847                 |
| 8          | 12114                  | 25737                 | 58         | 26912                  | 71956                 |
| 9          | 12352                  | 27399                 | 59         | 27320                  | 72858                 |
| 10         | 12614                  | 28776                 | 60         | 27650                  | 74061                 |
| 11         | 12855                  | 30112                 | 61         | 28031                  | 74956                 |
| 12         | 13108                  | 31126                 | 62         | 28359                  | 75883                 |
| 13         | 13321                  | 32469                 | 63         | 28753                  | 76725                 |
| 14         | 13521                  | 33765                 | 64         | 29122                  | 77734                 |
| 15         | 13721                  | 34812                 | 65         | 29578                  | 78603                 |
| 16         | 13925                  | 36243                 | 66         | 30095                  | 79389                 |
| 17         | 14142                  | 37011                 | 67         | 30578                  | 80848                 |
| 18         | 14417                  | 38231                 | 68         | 31151                  | 81901                 |
| 19         | 14643                  | 38918                 | 69         | 31749                  | 83122                 |
| 20         | 14889                  | 39797                 | 70         | 32301                  | 84328                 |
| 21         | 15145                  | 40949                 | 71         | 32860                  | 85513                 |
| 22         | 15379                  | 42002                 | 72         | 33428                  | 86706                 |
| 23         | 15636                  | 42955                 | 73         | 34172                  | 87922                 |
| 24         | 15851                  | 44078                 | 74         | 35050                  | 88696                 |
| 25         | 16053                  | 44905                 | 75         | 35916                  | 89583                 |
| 26         | 16257                  | 45860                 | 76         | 36932                  | 90954                 |
| 27         | 16508                  | 46818                 | 77         | 37911                  | 92421                 |
| 28         | 16782                  | 47827                 | 78         | 38945                  | 93539                 |
| 29         | 17068                  | 48335                 | 79         | 40056                  | 94923                 |
| 30         | 17374                  | 49179                 | 80         | 41447                  | 96623                 |
| 31         | 17679                  | 49931                 | 81         | 42753                  | 99381                 |
| 32         | 17954                  | 50735                 | 82         | 43946                  | 101093                |
| 33         | 18252                  | 51578                 | 83         | 45529                  | 104252                |
| 34         | 18557                  | 52175                 | 84         | 47178                  | 106121                |
| 35         | 18848                  | 52740                 | 85         | 49117                  | 108546                |
| 36         | 19153                  | 53724                 | 86         | 50846                  | 110485                |
| 37         | 19393                  | 54489                 | 87         | 52814                  | 113685                |
| 38         | 19649                  | 55103                 | 88         | 55117                  | 116872                |
| 39         | 19924                  | 55914                 | 89         | 57896                  | 120734                |
| 40         | 20251                  | 56846                 | 90         | 60935                  | 124830                |
| 41         | 20615                  | 57569                 | 91         | 64000                  | 129652                |
| 42         | 20956                  | 58239                 | 92         | 68773                  | 135339                |
| 43         | 21319                  | 58949                 | 93         | 74674                  | 142100                |
| 44         | 21677                  | 59889                 | 94         | 81033                  | 148357                |
| 45         | 22053                  | 60476                 | 95         | 89025                  | 160278                |
| 46         | 22435                  | 61272                 | 96         | 100736                 | 176949                |
| 47         | 22805                  | 61984                 | 97         | 116708                 | 196138                |
| 48         | 23147                  | 62992                 | 98         | 141988                 | 232624                |
| 49         | 23483                  | 63907                 | 99         | 181966                 | 285071                |
| 50         | 23788                  | 64816                 | 100        | 364221                 | 318278                |

## S.4 Model fit and residuals

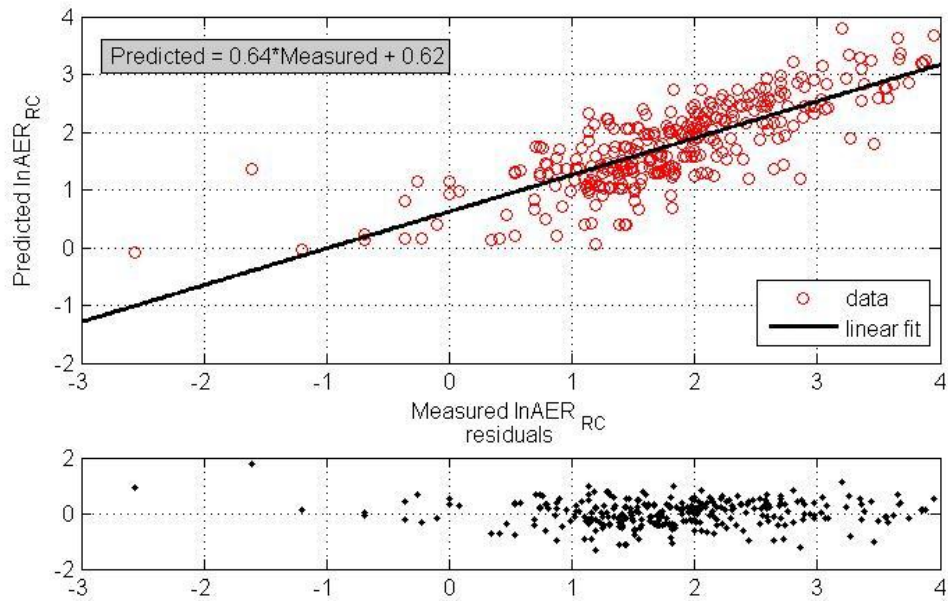

Figure S-1: Model predictions vs. AER measurements under RC conditions

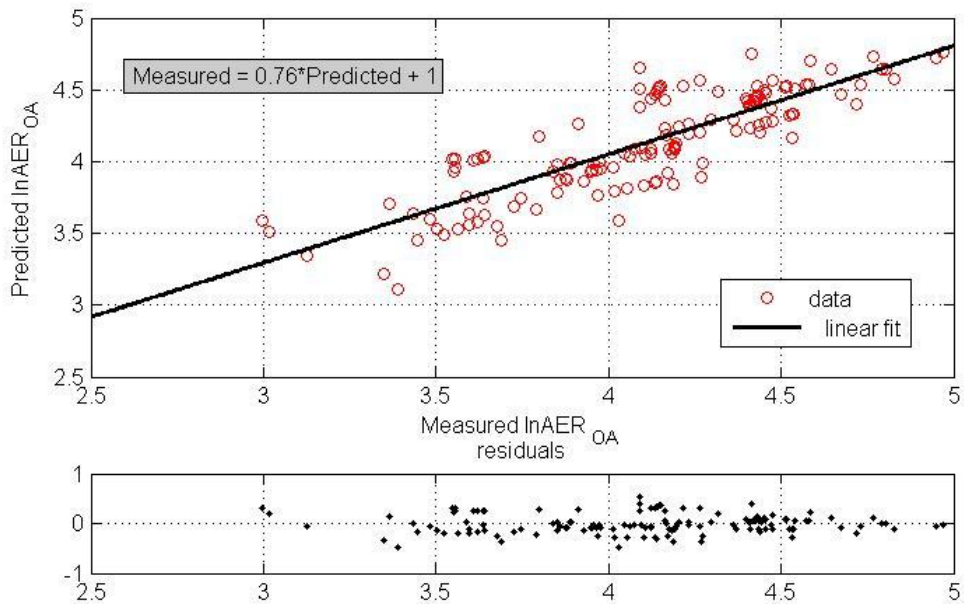

Figure S-2: Model predictions vs. AER measurements under OA conditions

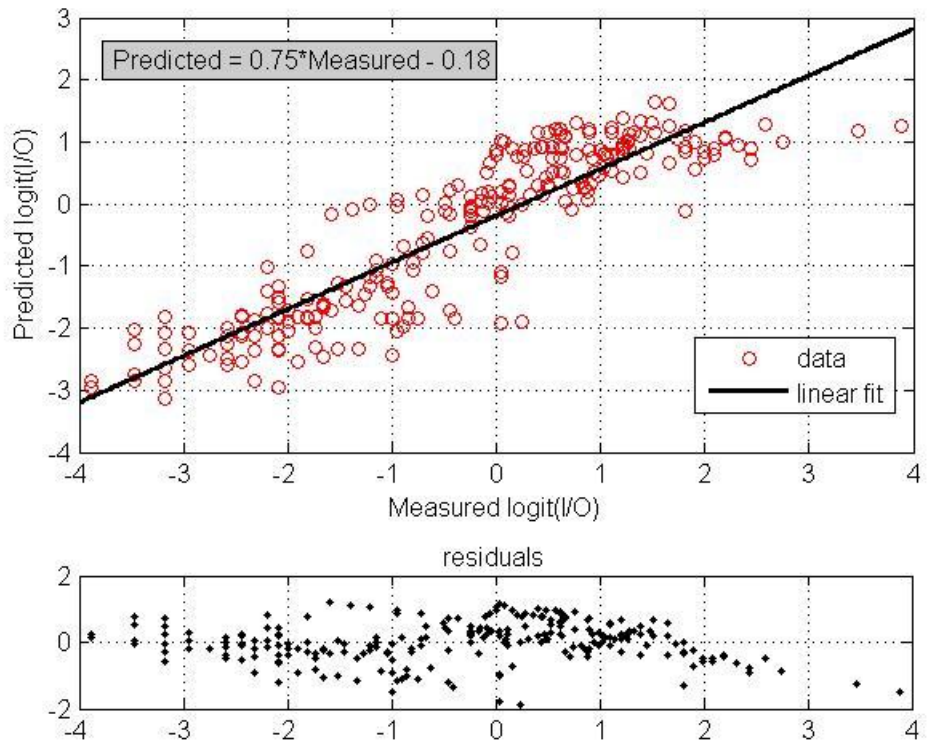

Figure S-3: Model predictions vs. I/O ratio measurements
